# Supplementary material for: Comparison of the phenolic profiles and physicochemical properties of different varieties of thermally processed canned lychee pulp
Source: Royal Society of Chemistry journal article supplement (doi:10.1039/c9ra08393f), 2020-01-01
Supplement: c9ra08393f1.pdf [file c9ra08393f1.pdf]

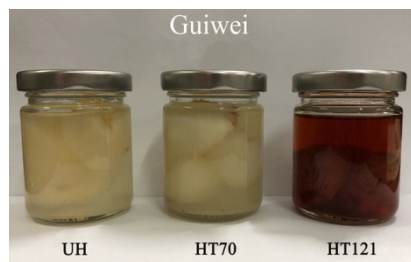

**Figure S1.** The samples of canned *Guiwei* after heat treatment at different temperatures.

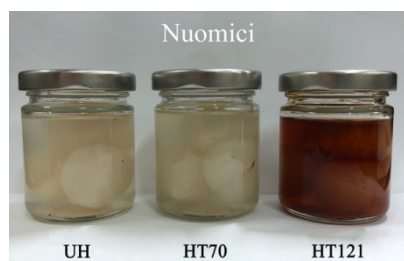

**Figure S2.** The samples of canned *Nuomici* after heat treatment at different temperatures.
